# Supplementary material
Source: PubMed Central journal article supplement (PMC2761144)

(A) Male body weight (g)

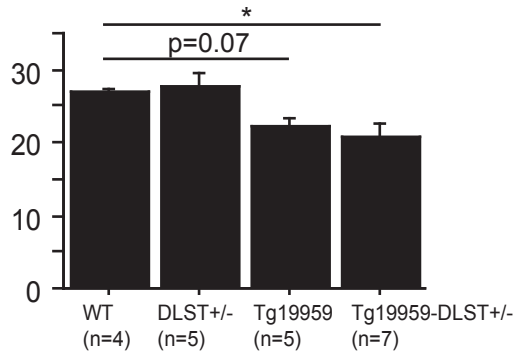

(B) Female body weight (g)

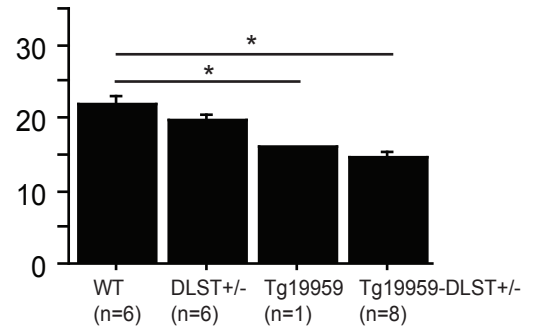

Supplement: NIHMS132172-supplement-01.pdf [file NIHMS132172-supplement-01.pdf]
